# Supplementary material for: A metal–organic framework approach to engineer mesoporous ZnMnO3/C towards enhanced lithium storage
Source: Royal Society of Chemistry journal article supplement (doi:10.1039/d1se01883c), 2022-01-01
Supplement: d1se01883c1.pdf [file d1se01883c1.pdf]

## Supporting Information

### **A metal-organic framework approach to engineer mesoporous ZnMnO<sub>3</sub>/C towards enhanced lithium storage**

Xi Hu, Qianhong Huang, Yuze Zhang, Hao Zhong, Zhi Lin, Xiaoming Lin,\* Akif  
Zeb,\* Chao Xu\* and Xuan Xu\*

*Guangzhou Key Laboratory of Materials for Energy Conversion and Storage, Key  
Laboratory of Theoretical Chemistry of Environment, Ministry of Education, School  
of Chemistry, South China Normal University, Guangzhou 510006, P.R. China.*

---

\*Author to whom correspondence should be addressed: E-mail: [linxm@scnu.edu.cn](mailto:linxm@scnu.edu.cn)  
(X. M. Lin); [akif\\_zeb7@yahoo.com](mailto:akif_zeb7@yahoo.com); [chaoxu@m.scnu.edu.cn](mailto:chaoxu@m.scnu.edu.cn) (C. Xu);  
[xuxuan@scnu.edu.cn](mailto:xuxuan@scnu.edu.cn) (X. Xu).

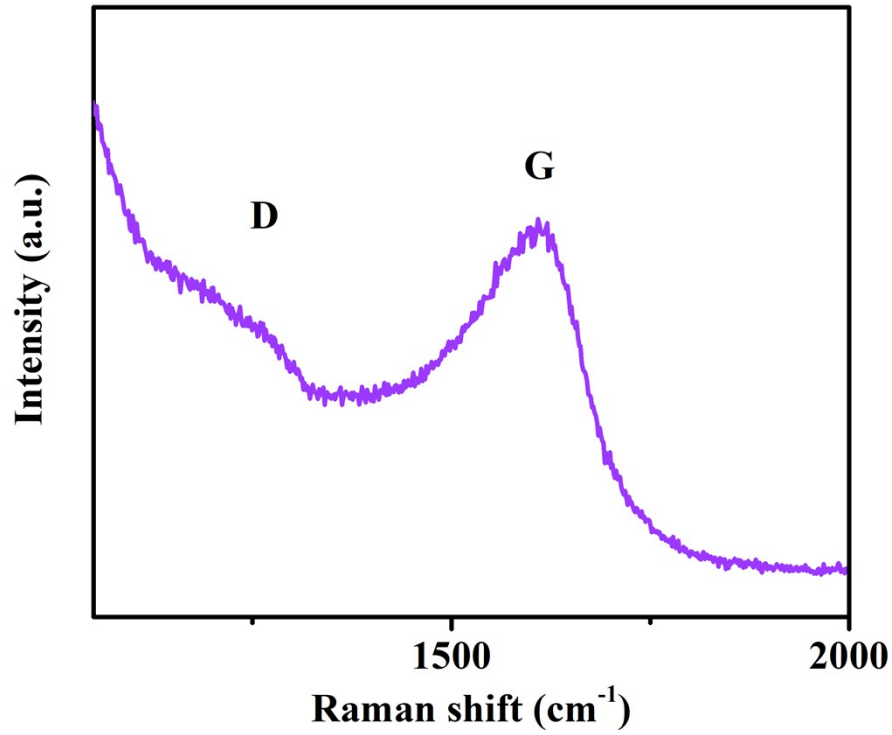

Fig. S1 Raman spectrum of ZnMnO<sub>3</sub>/C.

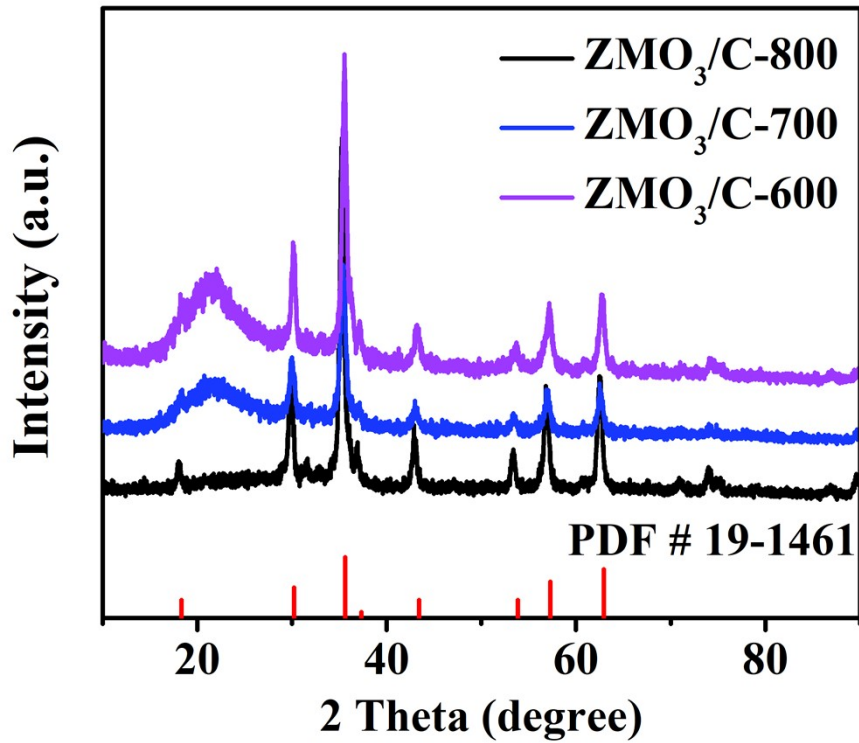

Fig. S2. XRD patterns of ZnMnO<sub>3</sub>/C calcinated at 600, 700 and 800 °C.

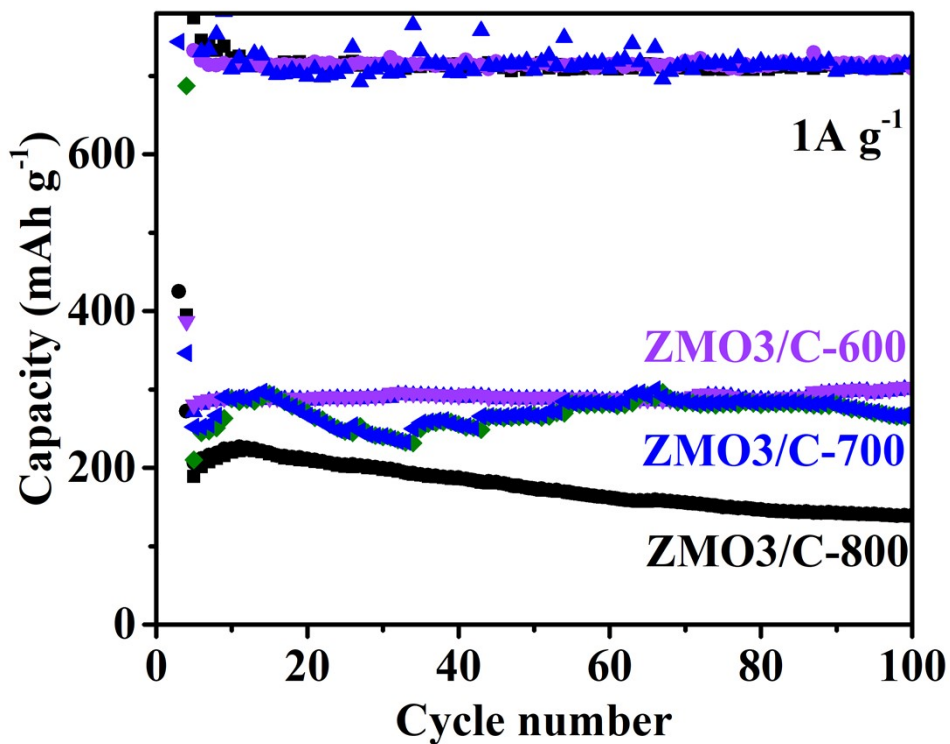

Fig. S3. Cycling performance of  $\text{ZnMnO}_3/\text{C}$  at  $1 \text{ A g}^{-1}$

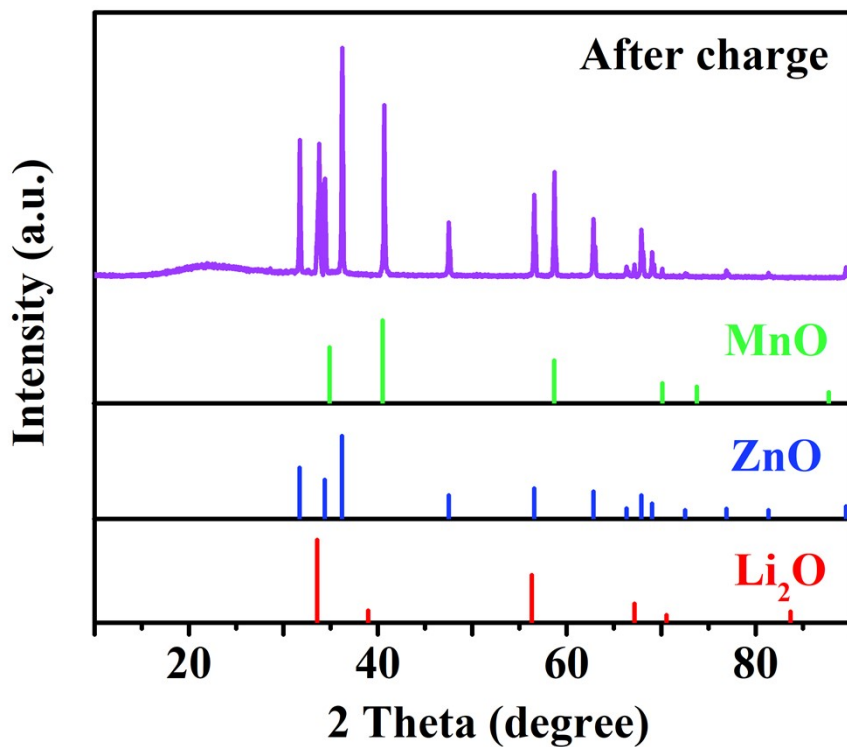

Fig. S4. XRD patterns of the  $\text{ZnMnO}_3/\text{C}$  electrode after 20 cycles of the charge process.

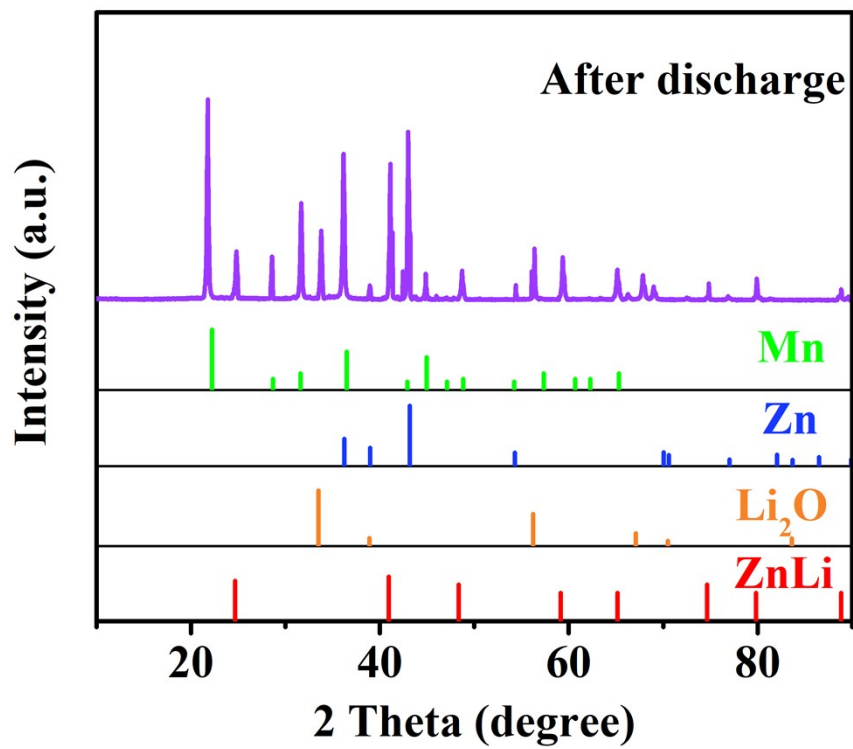

Fig. S5. XRD patterns of the ZnMnO<sub>3</sub>/C electrode after 20 cycles of the discharge process.

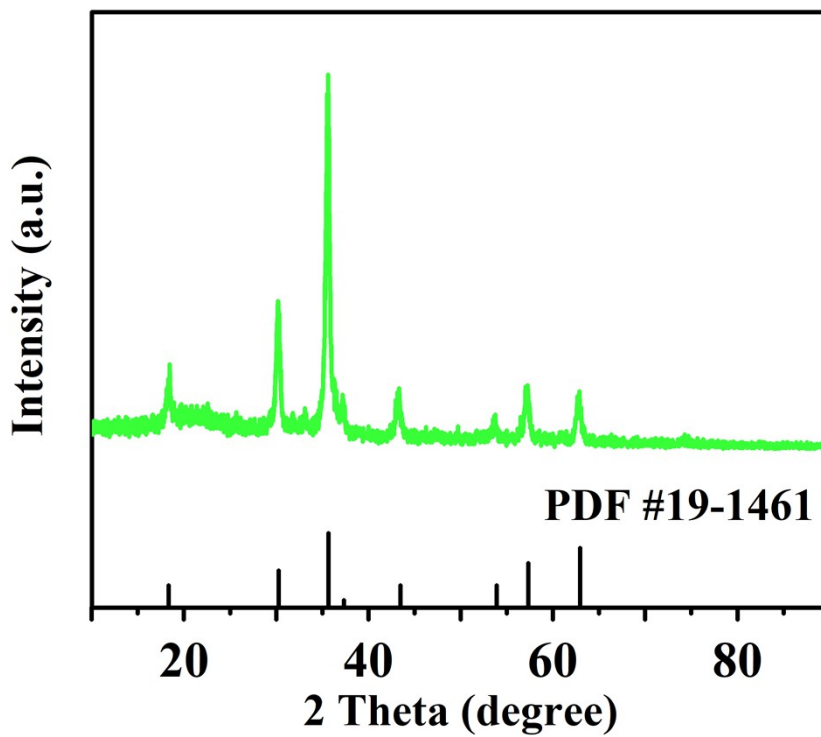

Fig. S6. XRD pattern of ZnMnO<sub>3</sub>.

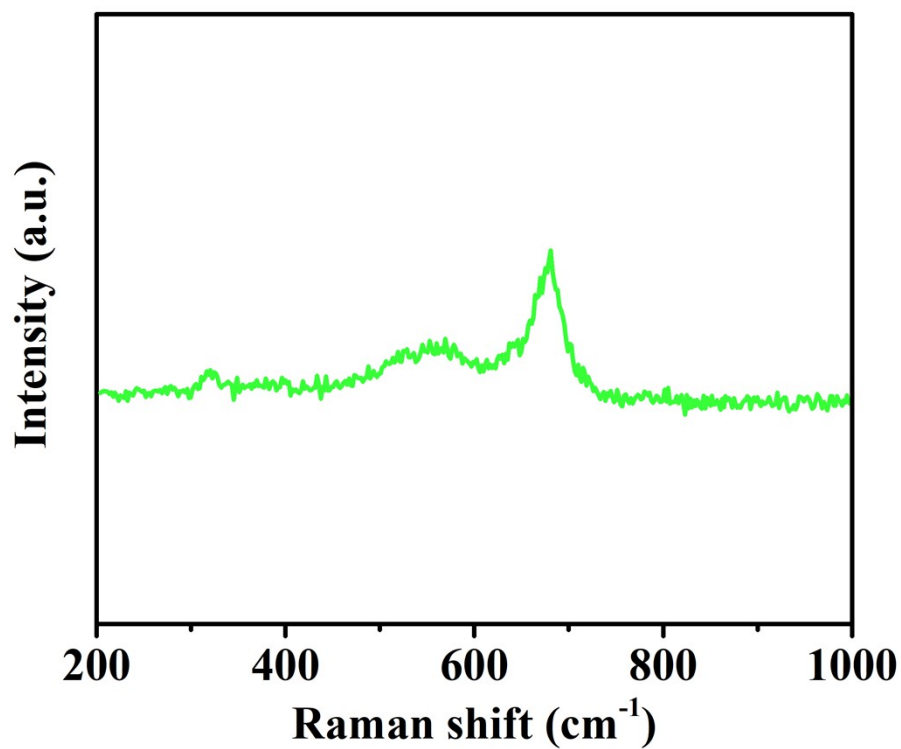

Fig. S7. Raman spectrum of ZnMnO<sub>3</sub>.

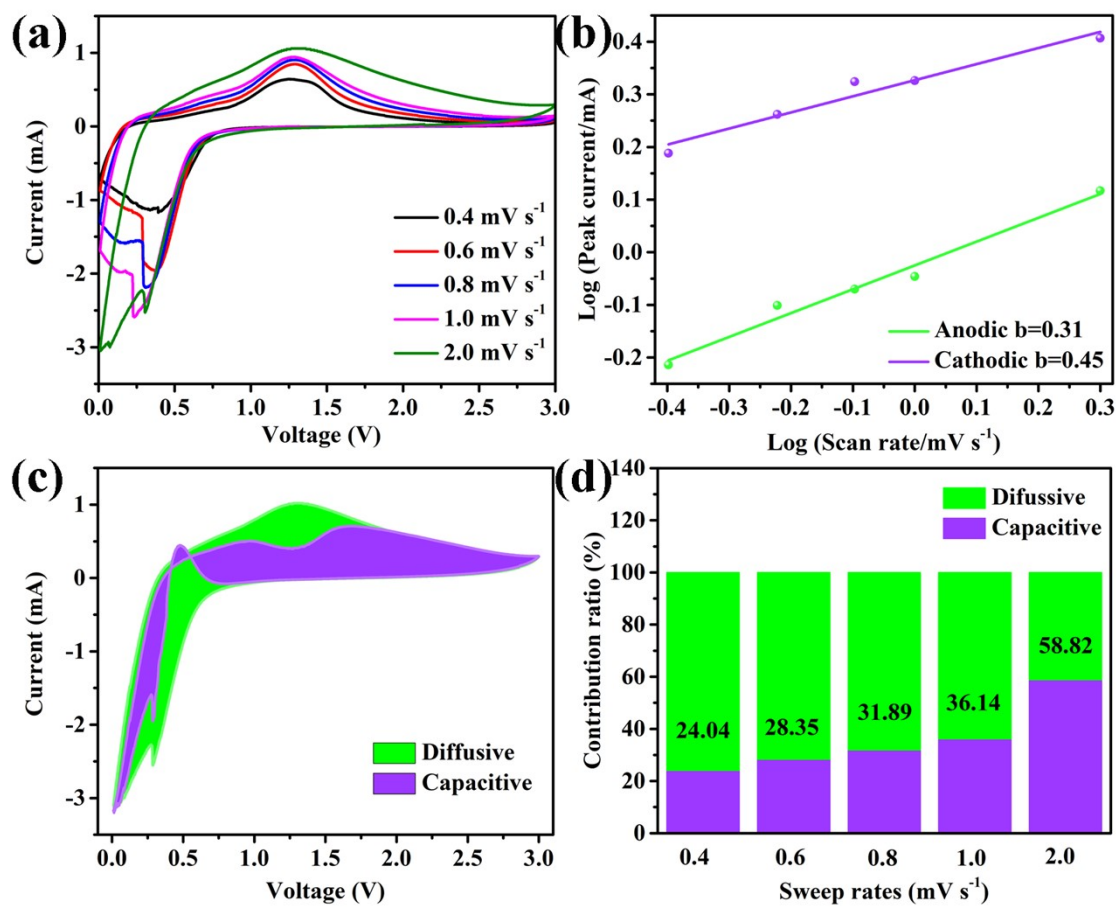

Fig. S8. (a) CV curves of ZnMnO<sub>3</sub> electrode at different sweep rates; (b) A linear relationship between log (scan rate) and log (peak current); (c) Typical capacitive contribution of ZnMnO<sub>3</sub> electrode at 2.0 mV s<sup>-1</sup>; (d) Contribution ratios of capacitance at different scan rates.

Table S1 The comparison of specific capacitance hybrid materials and other reported materials

| Electrode materials                                            | Cycle capacity (mAh g <sup>-1</sup> ) | Cycle number | Ref       |
|----------------------------------------------------------------|---------------------------------------|--------------|-----------|
| ZnMnO <sub>3</sub> porous spherulites                          | 729/0.5 A g <sup>-1</sup>             | 50           | S1        |
| Hierarchical porous ZnMnO <sub>3</sub> yolk-shell microspheres | 540/0.4 A g <sup>-1</sup>             | 300          | S2        |
| Porous ZnMnO <sub>3</sub>                                      | 560/0.4 A g <sup>-1</sup>             | 300          | S3        |
| Multi-shelled ZnMnO <sub>3</sub> hollow micro-spheres          | 290/0.4 A g <sup>-1</sup>             | 150          | S4        |
| 1D ZnMnO <sub>3</sub>                                          | 382.9/0.8 A g <sup>-1</sup>           | 100          | S5        |
| MOF-derived ZnMnO <sub>3</sub> /C                              | 460/1 A g <sup>-1</sup>               | 500          | This work |

#### References

- (S1) X. R. Liu, C. H. Zhao, H. Zhang and Q. Shen, Facile synthesis of porous ZnMnO<sub>3</sub> spherulites with a high lithium storage capability, *Electrochim. Acta*, 2015, **151**, 56-62.
- (S2) X. R. Su, J. Huang, B. Y. Yan, Z. P. Hong, S. Y. Li, B. C. Pang, Y. L. Luo, L. Feng, M. J. Zhou and Y. Y. Xia, Hierarchical porous ZnMnO<sub>3</sub> yolk-shell microspheres with superior lithium storage properties enabled by a unique one-step conversion mechanism, *RSC Adv.*, 2018, **8**, 31388-31395.
- (S3) C. H. Zhao, Z. G. Teng, D. N. Zhao, Z. B. Hu and K. Y. Liu, Porous ZnMnO<sub>3</sub> plates prepared from Zn/Mn-sucrose composite as high-

performance lithium-ion battery anodes, *Micro & Nano Letters*, 2016, **11**, 494-497.

(S4) J. Y. Xu, H. Zhang, R. F. Wang, P. B. Xu, Y. L. Tong and F. Gao, Delicate control of multishelled Zn-Mn-O hollow microspheres as a high-performance anode for lithium-ion batteries, *Langmuir*, 2018, **34**, 1242-1248.

(S5) Y. Tian, Z. X. Chen, W. J. Tang, Z. H. Yang, W. X. Zhang, S. Li, K. Wang, Y. H. Su, Q. Xia and B. Guo, A facile synthetic protocol to construct 1D Zn-Mn-Oxide nanostructures with tunable compositions for high-performance lithium storage, *J. Alloy. Compd.*, 2017, **720**, 376-382.
